# Supplementary material
Source: publisher site journal article supplement (https://www.dovepress.com/article/302514)
Supplement: Supplementary file 1 [file get_supplementary_file.php]

**Double-Controlled Release of Poorly Water-Soluble Palliperidone Palmitate from Self-Assembled Albumin-Oleic Acid Nanoparticles in PLGA in situ Forming Implant**

Yongjun Yua, Hai V. Ngoa, Gang Jina, Phuong H.L. Tranb, Thao T.D. Tranc,d, Van Hong Nguyene, Beom-Jin Leea,*

a*College of Pharmacy, Ajou University, Suwon 16499, Republic of Korea*

b*Deakin University, School of Medicine, Geelong, Australia*

c*Institute of Research and Development, Duy Tan University, Danang 550000, Vietnam*

d*The Faculty of Pharmacy, Duy Tan University, Danang 550000, Vietnam*

e*Pharmaceutical Engineering Laboratory, Biomedical Engineering Department, International University, Vietnam National University, Ho Chi Minh City 70000, Vietnam*

**Table S1**

Stability profile of AONs after dispersion of AOC formulation (F2) in 2 mL NMP/water to the different volumes of PBS solution at room temperature for 2 weeks periods.

**a) Particle size**

| PBS solution | Initial (nm) | 1weeks (nm) | 2weeks (nm) |
| --- | --- | --- | --- |
| 5mL | 811.2 ± 43.1 | N.D | N.D |
| 10mL | 338.0 ± 9.9 | 350.7 ± 61.2 | 293.23 ± 1.27 |
| 20mL | 236.1 ± 1.0 | 411.8 ± 8.5 | 578.5 ± 24.22 |

N.D = Not detected, Mean ± SD (n=3)

**b) Polydispersity index**

| PBS solution | Initial | 1weeks | 2weeks |
| --- | --- | --- | --- |
| 5mL | 0.253 ± 0.016 | N.D | N.D |
| 10mL | 0.154 ± 0.042 | 0.26 ± 0.045 | 0.10 ± 0.005 |
| 20mL | 0.152 ± 0.034 | 0.22 ± 0.004 | - 1. ± 0.011 |

N.D = Not detected, Mean ± SD (n=3)

**c) Zeta potential**

| PBS solution | Initial (mV) | 1weeks (mV) | 2weeks (mV) |
| --- | --- | --- | --- |
| 5mL | -17.14 ± 1.16 | N.D | N.D |
| 10mL | -10.37 ± 0.09 | -10.24 ± 1.02 | -12.47 ± 3.03 |
| 20mL | -14.97 ± 2.47 | -20.48 ± 1.01 | -16.75 ± 0.66 |

N.D = Not detected, Mean ± SD (n=3)
